# Supplementary material for: Potential for natural evaporation as a reliable renewable energy resource
Source: PubMed Central journal article supplement (PMC5615039; doi:10.1038/s41467-017-00581-w), 2017-09-26
Supplement: 41467_2017_581_MOESM1_ESM.pdf [file 41467_2017_581_MOESM1_ESM.pdf]

### **Description of Supplementary Files**

File Name: Supplementary Information

Description: Supplementary Figures and Supplementary Table

| <i>US State</i>       | Open Water Surface Area (km <sup>2</sup> ) | Potential Power Available (MW) | Potential Water Savings (10 <sup>6</sup> m <sup>3</sup> / year) | Net Energy Generation Rate (MW) | Freshwater Withdrawals (10 <sup>6</sup> m <sup>3</sup> / year) |
|-----------------------|--------------------------------------------|--------------------------------|-----------------------------------------------------------------|---------------------------------|----------------------------------------------------------------|
| <i>Utah</i>           | 8,393.0                                    | 47,200.53                      | 10,540.70                                                       | 4,788.71                        | 5,711.02                                                       |
| <i>California</i>     | 4,844.8                                    | 27,550.54                      | 6,376.01                                                        | 22,454.78                       | 43,048.52                                                      |
| <i>Texas</i>          | 5,835.2                                    | 21,557.70                      | 7,105.39                                                        | 51,350.04                       | 31,330.44                                                      |
| <i>Minnesota</i>      | 8,996.0                                    | 19,251.52                      | 6,651.15                                                        | 6,504.54                        | 5,279.30                                                       |
| <i>Florida</i>        | 5,778.5                                    | 18,516.16                      | 6,555.36                                                        | 27,101.90                       | 8,572.70                                                       |
| <i>Louisiana</i>      | 4,413.7                                    | 14,353.23                      | 4,704.11                                                        | 12,307.35                       | 11,804.42                                                      |
| <i>Nevada</i>         | 1,710.4                                    | 12,292.26                      | 2,586.21                                                        | 4,457.40                        | 3,614.10                                                       |
| <i>Oklahoma</i>       | 2,729.3                                    | 9,831.92                       | 3,159.98                                                        | 8,691.28                        | 2,454.63                                                       |
| <i>Oregon</i>         | 2,382.9                                    | 8,994.33                       | 2,332.57                                                        | 6,605.77                        | 9,312.79                                                       |
| <i>Montana</i>        | 2,854.4                                    | 8,628.27                       | 2,615.48                                                        | 3,345.02                        | 10,546.27                                                      |
| <i>Maine</i>          | 4,029.0                                    | 8,357.80                       | 2,845.18                                                        | 1,340.33                        | 564.93                                                         |
| <i>South Dakota</i>   | 3,030.5                                    | 7,617.27                       | 2,762.17                                                        | 1,099.66                        | 864.67                                                         |
| <i>Tennessee</i>      | 2,435.0                                    | 7,471.78                       | 2,301.29                                                        | 8,586.15                        | 10,644.95                                                      |
| <i>Idaho</i>          | 1,816.9                                    | 6,896.89                       | 1,795.02                                                        | 1,788.48                        | 23,806.20                                                      |
| <i>North Dakota</i>   | 2,831.9                                    | 6,833.77                       | 2,425.13                                                        | 4,241.62                        | 1,566.52                                                       |
| <i>North Carolina</i> | 2,259.9                                    | 6,759.28                       | 2,301.30                                                        | 14,656.22                       | 15,295.17                                                      |
| <i>Alabama</i>        | 2,096.0                                    | 6,743.71                       | 2,080.63                                                        | 17,406.10                       | 13,815.00                                                      |
| <i>Wisconsin</i>      | 2,873.7                                    | 6,460.54                       | 2,212.82                                                        | 7,575.36                        | 8,511.02                                                       |
| <i>Wyoming</i>        | 1,420.4                                    | 6,004.67                       | 1,543.46                                                        | 5,589.79                        | 6,414.11                                                       |
| <i>Arkansas</i>       | 1,693.5                                    | 5,725.01                       | 1,742.70                                                        | 6,342.40                        | 15,665.22                                                      |
| <i>Georgia</i>        | 1,657.8                                    | 5,430.77                       | 1,726.02                                                        | 14,705.24                       | 6,130.40                                                       |
| <i>Washington</i>     | 1,887.3                                    | 5,280.05                       | 1,616.29                                                        | 12,475.74                       | 6,808.82                                                       |
| <i>New York</i>       | 2,459.3                                    | 5,230.50                       | 1,871.86                                                        | 15,825.08                       | 7,918.95                                                       |
| <i>Missouri</i>       | 1,602.2                                    | 5,153.40                       | 1,609.49                                                        | 9,547.95                        | 11,853.76                                                      |
| <i>South Carolina</i> | 1,503.9                                    | 4,889.18                       | 1,595.62                                                        | 11,019.66                       | 9,374.46                                                       |
| <i>Michigan</i>       | 2,000.4                                    | 4,317.96                       | 1,541.75                                                        | 12,900.46                       | 14,925.13                                                      |
| <i>New Mexico</i>     | 598.6                                      | 3,734.85                       | 874.37                                                          | 3,733.04                        | 4,366.53                                                       |
| <i>Virginia</i>       | 1,154.0                                    | 3,428.69                       | 1,137.83                                                        | 9,636.03                        | 6,130.40                                                       |
| <i>Arizona</i>        | 403.0                                      | 3,407.94                       | 710.25                                                          | 12,915.76                       | 8,412.35                                                       |
| <i>Colorado</i>       | 634.2                                      | 2,917.65                       | 735.66                                                          | 5,980.94                        | 15,171.83                                                      |
| <i>Kansas</i>         | 898.8                                      | 2,795.83                       | 976.10                                                          | 5,197.16                        | 5,538.33                                                       |
| <i>Vermont</i>        | 1,246.7                                    | 2,775.62                       | 1,018.56                                                        | 226.26                          | 595.77                                                         |
| <i>Illinois</i>       | 972.4                                      | 2,620.09                       | 887.48                                                          | 22,140.64                       | 18,008.83                                                      |
| <i>Kentucky</i>       | 850.9                                      | 2,503.63                       | 768.84                                                          | 9,536.95                        | 5,982.39                                                       |
| <i>Mississippi</i>    | 703.0                                      | 2,420.52                       | 753.45                                                          | 7,392.45                        | 5,328.64                                                       |
| <i>Nebraska</i>       | 635.1                                      | 2,081.10                       | 677.34                                                          | 4,552.90                        | 11,113.67                                                      |
| <i>New Hampshire</i>  | 586.2                                      | 1,434.13                       | 457.15                                                          | 2,284.92                        | 506.96                                                         |
| <i>Iowa</i>           | 534.7                                      | 1,284.57                       | 463.81                                                          | 6,467.91                        | 4,243.18                                                       |
| <i>Ohio</i>           | 506.6                                      | 1,164.58                       | 428.32                                                          | 13,914.77                       | 13,074.91                                                      |
| <i>Massachusetts</i>  | 500.3                                      | 1,117.73                       | 407.11                                                          | 3,662.78                        | 1,467.84                                                       |
| <i>Pennsylvania</i>   | 456.4                                      | 1,104.55                       | 375.42                                                          | 24,494.55                       | 11,249.35                                                      |
| <i>Indiana</i>        | 421.9                                      | 1,066.98                       | 371.42                                                          | 11,874.35                       | 11,952.44                                                      |
| <i>Maryland</i>       | 277.7                                      | 771.23                         | 264.53                                                          | 4,151.32                        | 2,035.25                                                       |
| <i>New Jersey</i>     | 258.4                                      | 705.17                         | 244.93                                                          | 8,516.99                        | 2,676.66                                                       |
| <i>Connecticut</i>    | 157.1                                      | 353.80                         | 125.81                                                          | 4,277.47                        | 1,128.64                                                       |
| <i>West Virginia</i>  | 111.7                                      | 297.77                         | 91.46                                                           | 8,252.88                        | 4,884.59                                                       |
| <i>Rhode Island</i>   | 43.1                                       | 98.34                          | 36.31                                                           | 792.13                          | 186.26                                                         |
| <i>Grand Total</i>    | 95,486.7                                   | 325,433.81                     | 96,403.85                                                       | 462,709.22                      | 419,888.32                                                     |

**Supplementary Table 1 | Summary statistics of open water surface area, potential power generation from natural evaporation, and concurrent water savings along with net energy generation rate and freshwater consumption data, by US State**

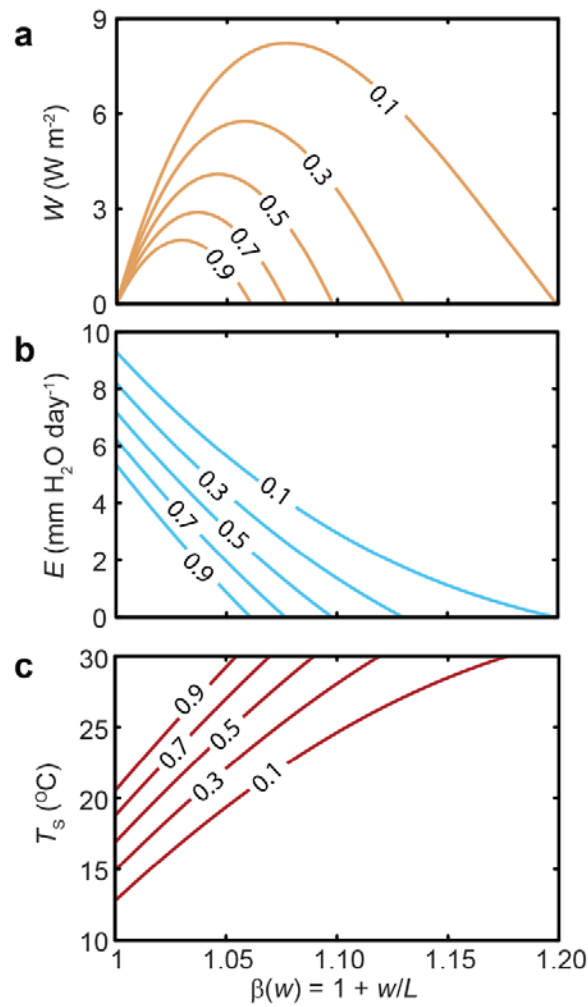

**Supplementary Figure 1 | Steady-state power generation and effects on evaporative losses as a function of  $\beta$**  a, Energy fluxes b, evaporation rates, and c, surface temperatures are calculated as a function of  $\beta(w)$  for weather conditions of  $200 \text{ W m}^{-2}$   $I$ ,  $16 \text{ }^{\circ}\text{C}$   $T_a$ ,  $101.3 \text{ kPa}$   $P$ , and  $2.7 \text{ m s}^{-1}$  (6 mph)  $u$  at 5 values of  $RH$  (mild conditions).  $\beta(w)$  depends on the load  $w$  (work done per mole of water evaporated).

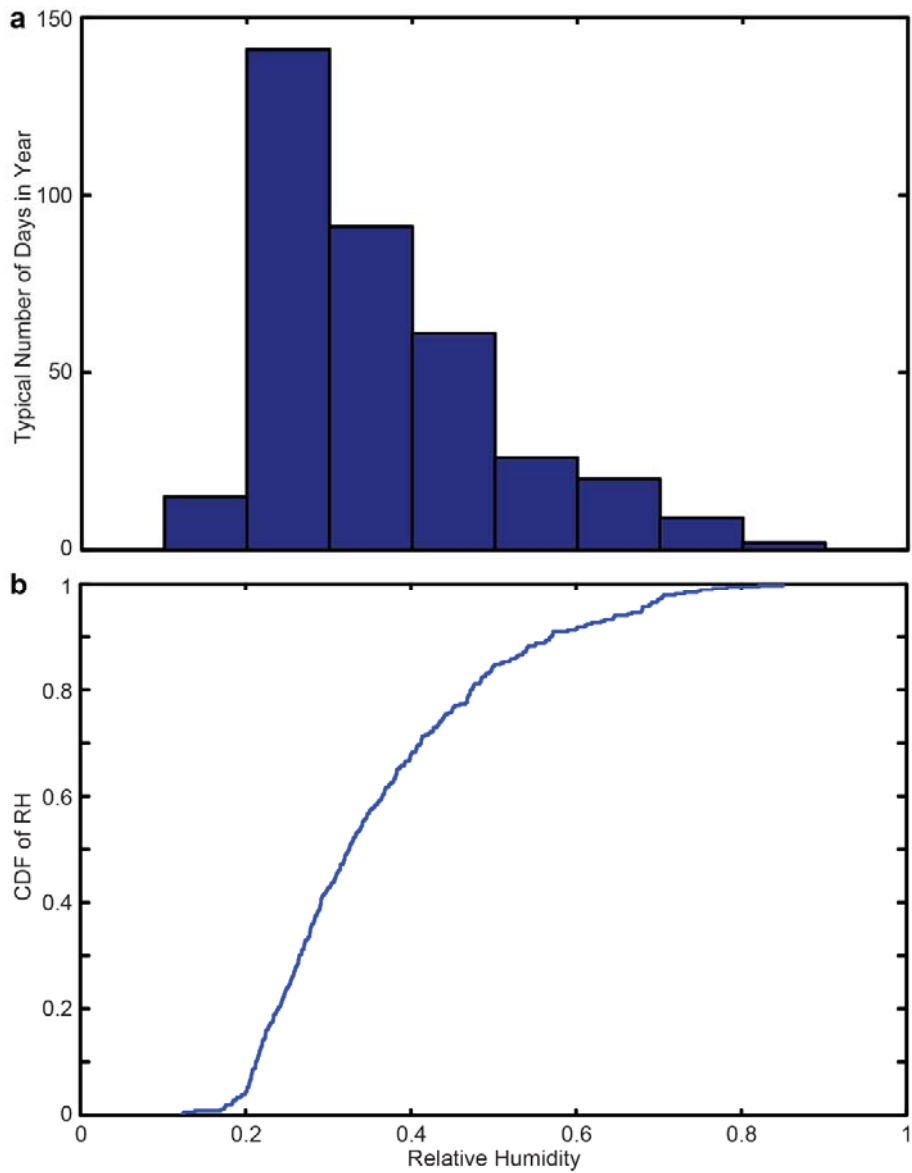

**Supplementary Figure 2 | Distribution of typical daily relative humidity in Daggett-Barstow, CA a, Histogram and b, empirical cumulative distribution function of typical daily relative humidity in Daggett-Barstow, California. The mean relative humidity is 36.2%, observed over 365 daily mean *RH* values from TMY3 data for the Daggett Barstow, California TMY3 data set.**

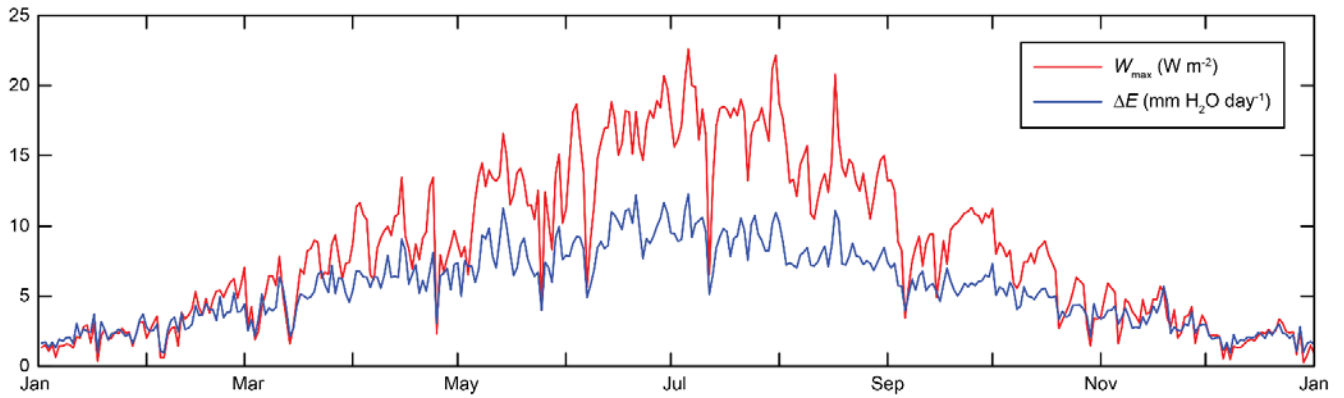

**Supplementary Figure 3 | Daily prediction of peak power generation and corresponding water savings in Daggett-Barstow, California** Daily maximum power output ( $W m^{-2}$ , blue) and corresponding water savings ( $mmH_2O day^{-1}$ , red) predicted by Equation 3 for Daggett Barstow, California. Input data is generated by using daily mean  $I$ ,  $T_a$ ,  $P$ ,  $u$ , and  $RH$  values from TMY3 data for the Daggett-Barstow, California TMY3 data set.

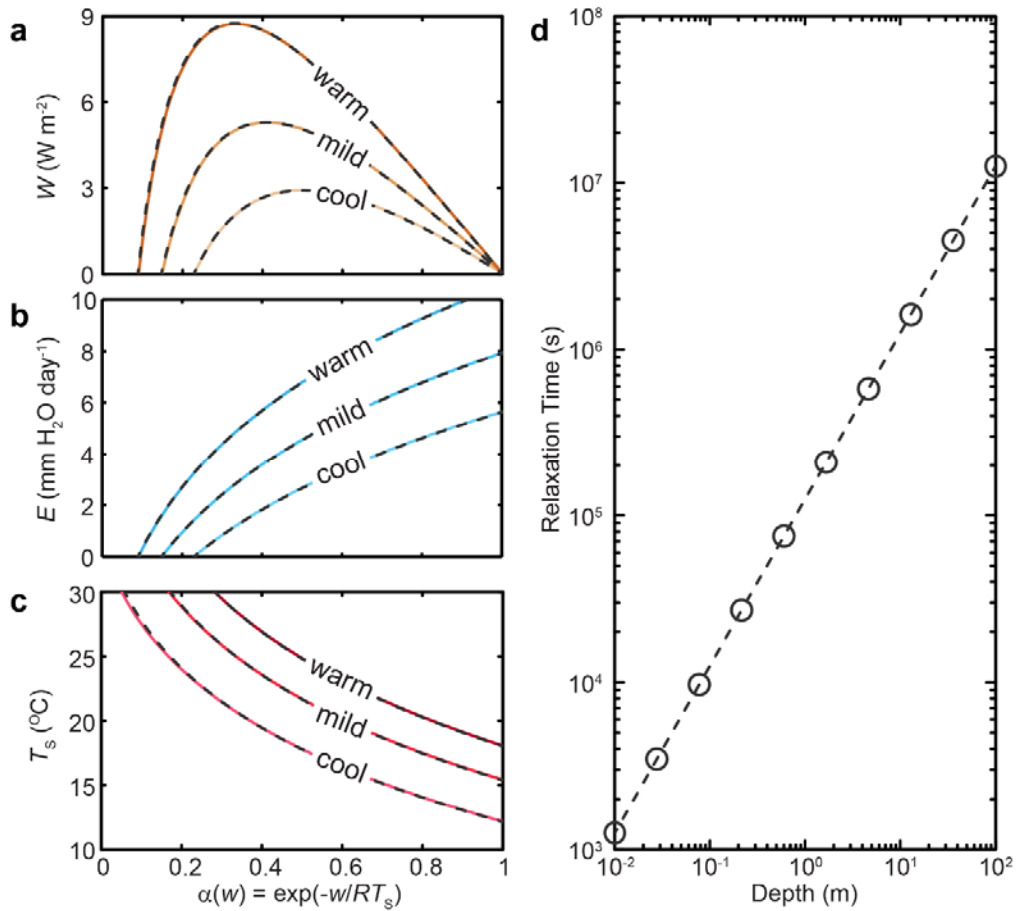

**Supplementary Figure 4 | Heat balance power generation model converges toward steady-state prediction and estimates of energy storage** **a**, Energy fluxes, **b**, evaporation rates, and **c**, surface temperatures of three selected conditions. Steady state results are solid lines, the final non-steady state results are dashed lines. The non-steady state results converge toward the steady state predictions after one simulation year. Results are calculated for cool (pale,  $12\ ^{\circ}C$ , 45% RH,  $150\ W\ m^{-2}$ ), mild (neutral,  $16\ ^{\circ}C$ , 35% RH,  $200\ W\ m^{-2}$ ), and warm (dark,  $20\ ^{\circ}C$ , 25% RH,  $250\ W\ m^{-2}$ ) weather conditions at  $2.7\ m\ s^{-1}$  (6 mph). The dotted lines show the convergence of a non-steady state model initialized at a surface temperature of 288 K with an isothermal depth of 5 m. The relaxation times of the surface temperature is plotted as a function of isothermal water depth **d**, for ten selected depths (circles) and interpolated (dashed line) at mild ( $16\ ^{\circ}C$ , 35% RH,  $200\ W\ m^{-2}$ ) conditions.

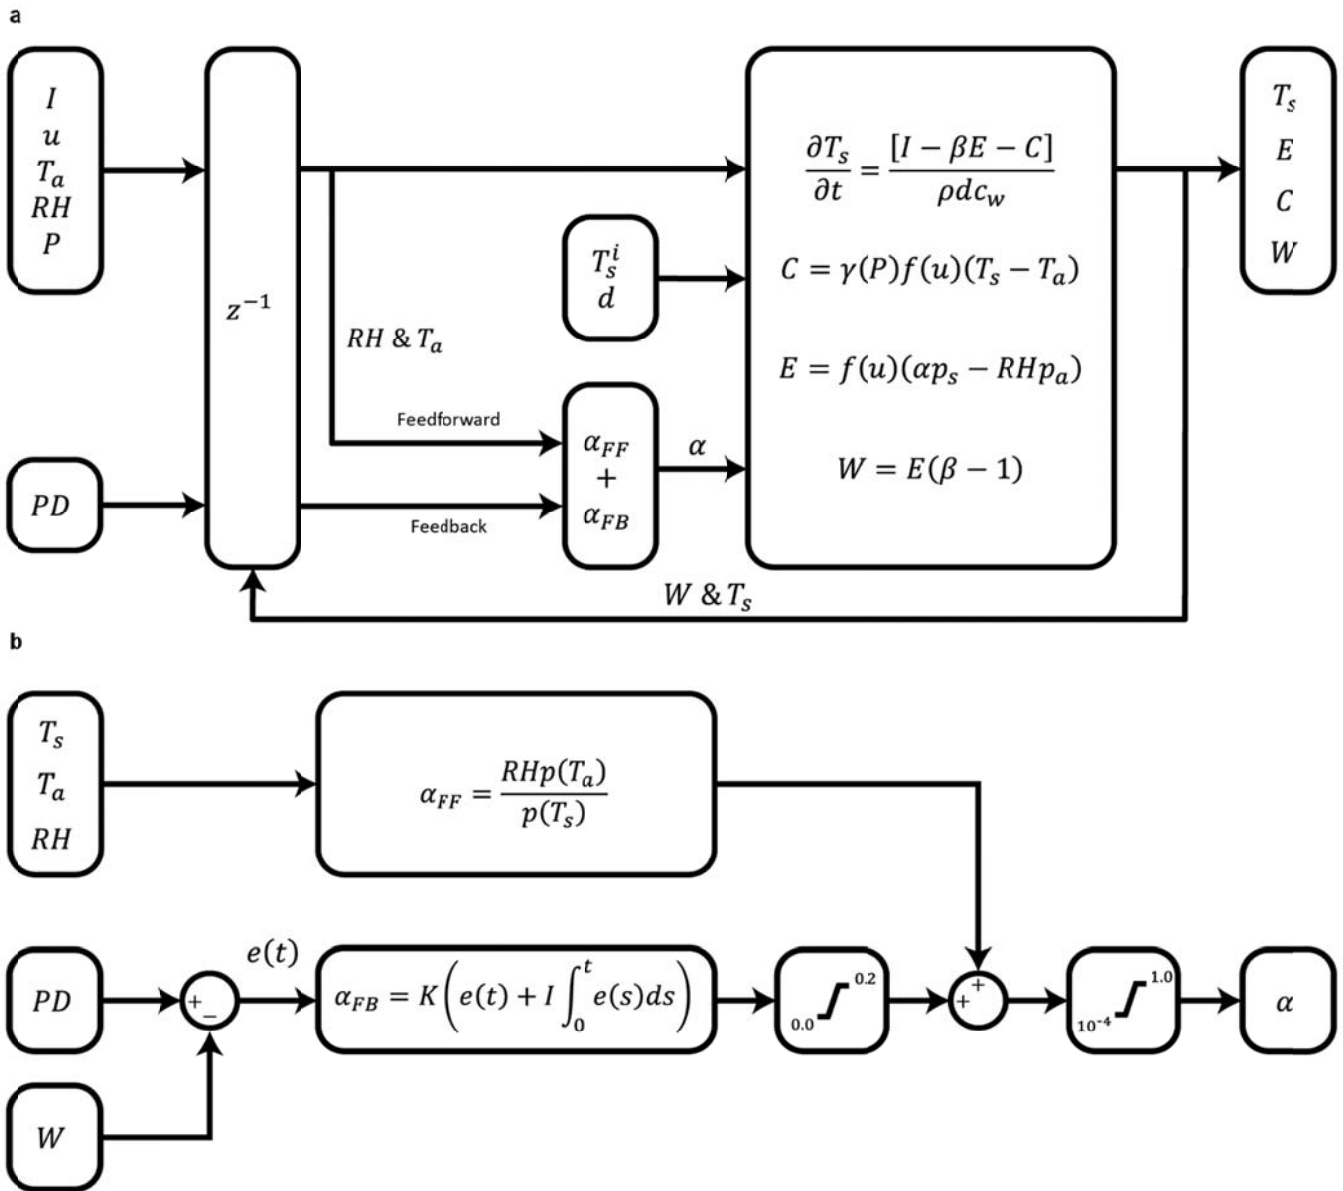

**Supplementary Figure 5 | Simulation model of a controlled evaporation driven engine a**, Process model for an evaporation energy harvesting power plant and **b**, the control model for simulating the reliability of such a power plant.

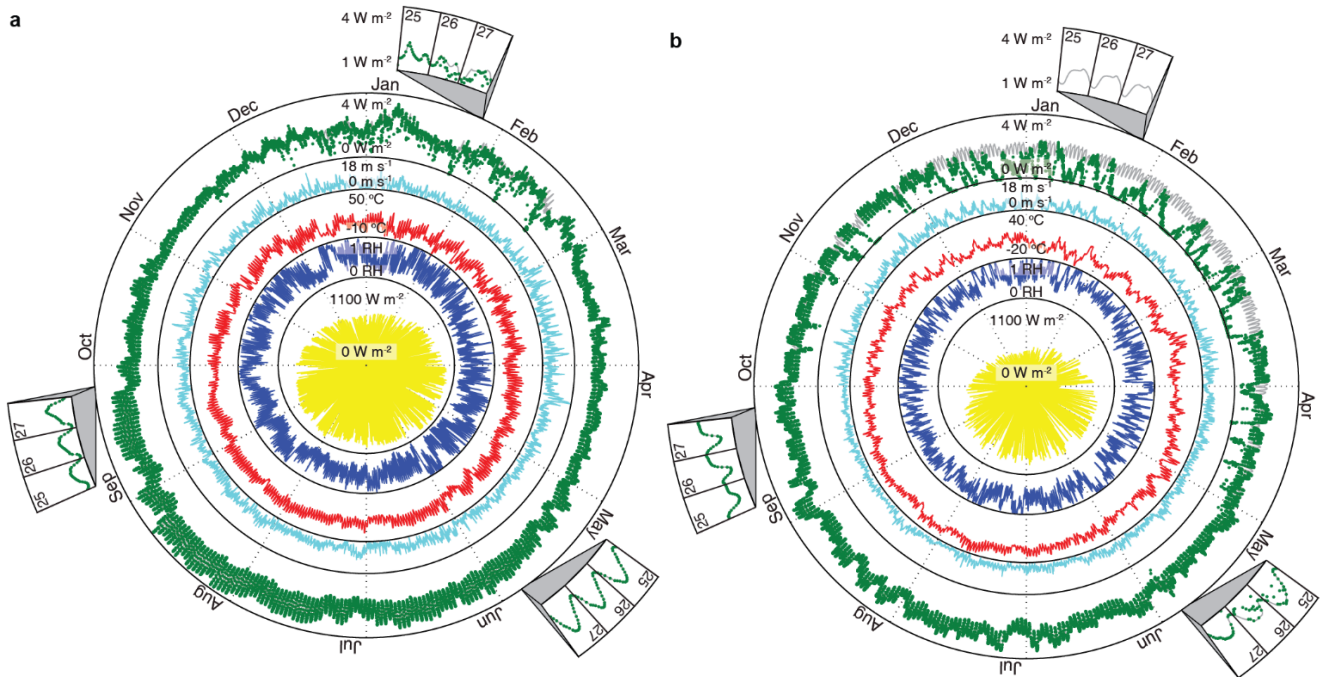

**Supplementary Figure 6 | Matching variable demand by controlling power output via heat storage**  
 Results for the final year of a simulation run for **a**, North Central Texas from Midland, Texas and **b**, Greater New York City from Newark, New Jersey. From inside-out: Hourly 1)  $I$  (yellow,  $\text{W m}^{-2}$ ), 2)  $RH$  (blue, %), 3)  $T_a$  (red,  $^{\circ}\text{C}$ ), 4)  $u$  (cyan,  $\text{m s}^{-1}$ ), 5)  $W_{PD}$  (gray,  $\text{W m}^{-2}$ ) and predicted  $W_O$  (green dots,  $\text{W m}^{-2}$ ), and 6) three 3-day zoomed in samples of hourly  $W_{PD}$  (gray,  $\text{W m}^{-2}$ ) and predicted  $W_O$  (green dots,  $\text{W m}^{-2}$ ). The results show that power generation matches demand **a**, 93% and **b**, 67% of the time. Meteorological data is from the TMY3 data set. The power demand data is from the **a**, ERCOT database or **b**, NYISO database. Annual data is evenly divided by hourly data.



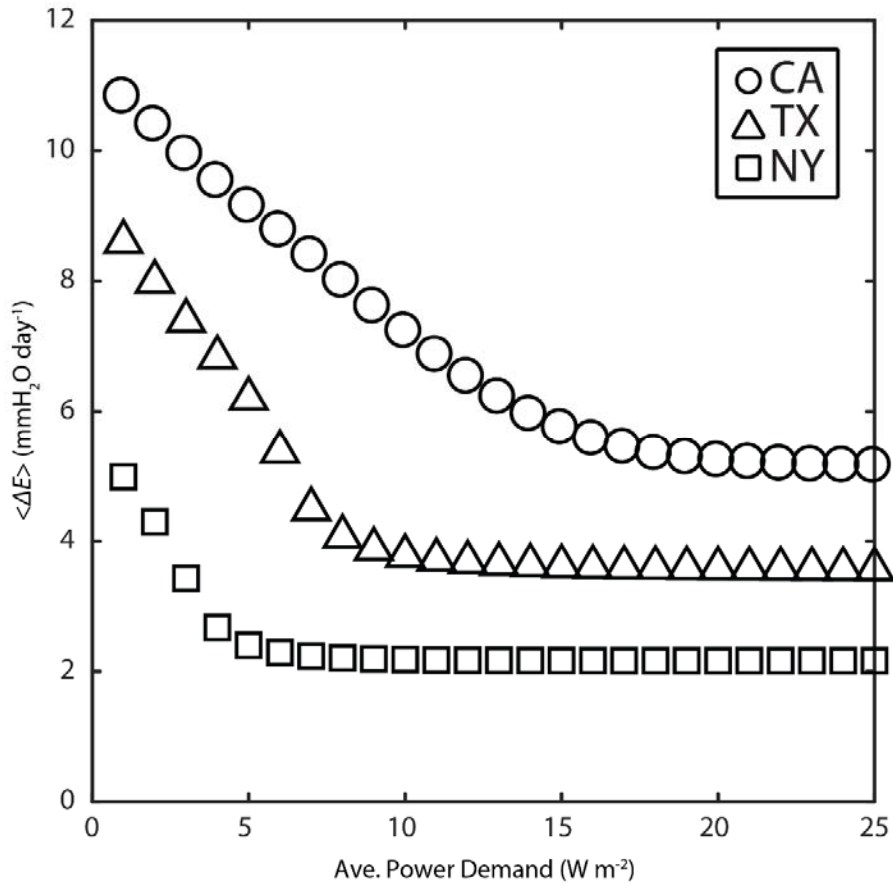

**Supplementary Figure 7 | The relationship between water savings and power demand** Predicted water savings as a function of target power demand for California (circles), Texas (triangles), and New York (squares) test locations. These simulations predict that the minimum water savings is 2.2, 3.6, and 5.1 mmH<sub>2</sub>O day<sup>-1</sup> for the respective New York, Texas, and California test locations.
